# Supplementary material for: Unique expression of the atypical mitochondrial subunit NDUFA4L2 in cerebral pericytes fine tunes HIF activity in response to hypoxia
Source: PubMed Central journal article supplement — J Cereb Blood Flow Metab. 2022 Aug 4;43(1):44–58. doi: 10.1177/0271678X221118236 (PMC9875353; doi:10.1177/0271678x221118236), 2022-08-04
Supplement: sj-pdf-1-jcb-10.1177_0271678X221118236.pdf [file sj-pdf-1-jcb-10.1177_0271678X221118236.pdf]

## **SUPPLEMENTAL MATERIALS**

### **Unique expression of the atypical mitochondrial subunit NDUFA4L2 in cerebral pericytes fine tunes HIF activity in response to hypoxia.**

Claudia Mesa-Ciller <sup>1\*</sup>, Guillermo Turiel <sup>2\*</sup>, Andrea Guajardo-Grence<sup>1</sup>, Ana Belen Lopez-Rodriguez <sup>3,4</sup>, Javier Egea <sup>3,4</sup>, Katrien de Bock<sup>2</sup>, Julián Aragonés<sup>1, 5</sup> and Andrés A Urrutia<sup>1+</sup>

<sup>1</sup> Unidad de Investigación Hospital de Santa Cristina, Instituto de Investigación del Hospital Universitario La Princesa, Departamento de Medicina, Universidad Autónoma de Madrid, 28049 Madrid (Spain)

<sup>2</sup> Laboratory of Exercise and Health, Department of Health Sciences and Technology, Swiss Federal Institute of Technology (ETH Zürich), Zürich 8603 (Switzerland)

<sup>3</sup>Molecular Neuroinflammation and Neuronal Plasticity Research Laboratory, Hospital Universitario Santa Cristina, Instituto de Investigación Sanitaria-Hospital Universitario de la Princesa, 28049 Madrid (Spain)

<sup>4</sup> Instituto Teófilo Hernando, Departamento de Farmacología y Terapéutica, Facultad de Medicina, UAM, Madrid (Spain)

<sup>5</sup> CIBER de Enfermedades Cardiovasculares, Carlos III Health Institute, Madrid (Spain)

**Supplemental table 1: List of primers**

| <b>Human gene</b> | <b>Forward primers 5'&gt;3'</b> | <b>Reverse primers 5'&gt;3'</b>    |
|-------------------|---------------------------------|------------------------------------|
| <i>28S</i>        | GGT AGC CAA ATG CCT CGT CAT     | GGA TAG TAG GTA GGG ACA GTG GGA AT |
| <i>NDUFA4L2</i>   | TTC TAC CGG CAG ATC AAA AGA CA  | GGG CGA GTC GCA GCA A              |
| <i>NDUFA4</i>     | TGC GTC TGG CAT TGT TCA A       | TCC AGG GCT CTG GGT TAT TTC        |
| <i>PDGFRB</i>     | AGA CAC GGG AGA ATA CTT TTG C   | AGT TCC TCG GCA TCA TTA GGG        |
| <i>ACTA2</i>      | GTG TTG CCC CTG AAG AGC AT      | GCT GGG ACA TTG AAA GTC TCA        |
| <i>MYH11</i>      | CAT CTA CTC GGA GAA GAT CGT CG  | CGC CTG TGC ATA GAA TGG ACT        |
| <i>GFAP</i>       | GCA CGC AGT ATG AGG CAA TG      | TAG TCG TTG GCT TCG TGC TT         |
| <i>PECAM1</i>     | CCA CTG CAG AGT ACC AGG TG      | CCA CCT TGG ATG GCC TCT TT         |
| <i>MAP2</i>       | CTC AGC ACC GCT AAC AGA GG      | CAT TGG CGC TTC GGA CAA G          |
| <i>PHD2</i>       | CCC TCA TGA AGT ACA ACC AGC AT  | CAT CTG CAT CAA AAT ACC AAA CAG T  |
| <i>PHD3</i>       | GCC GGC TGG GCA AAT ACT A       | CCG GAT AGC AAG CCA CCA T          |

| <b>Mouse gene</b> | <b>Forward primers 5'&gt;3'</b> | <b>Reverse primers 5'&gt;3'</b>    |
|-------------------|---------------------------------|------------------------------------|
| <i>28S</i>        | GGT AGC CAA ATG CCT CGT CAT     | GGA TAG TAG GTA GGG ACA GTG GGA AT |
| <i>Ndufa4l2</i>   | CCT GCG CAG TCC TGA TGT CT      | GGT TGA AAC GGC AAG GAA CTT        |
| <i>Ndufa4</i>     | AGC AGC ACT GTA TGT GAT GCG C   | TGT AGT CCA CAT TCA CAG AGT AGA    |
| <i>Cox4i2</i>     | ACA GTG ATG GGC TGC GTC TTC T   | CTG TTG GGC TTT CCG TTC TTC C      |

**Supplemental table 2: List of antibodies**

| <b>Antibody</b>            | <b>Host</b> | <b>Company</b> | <b>Reference</b> |
|----------------------------|-------------|----------------|------------------|
| $\alpha$ -SMA              | Mouse       | Dako           | M0851            |
| $\beta$ -ACTIN             | Mouse       | Sigma          | A3854            |
| $\beta$ III TUBULIN        | Mouse       | Santa Cruz     | sc-51670         |
| GFAP                       | Mouse       | Chemicon®      | Mab3402          |
| HIF1 $\alpha$              | Mouse       | BD Biosciences | 610959           |
| NDUFA4L2                   | Rabbit      | Proteintech    | 16480            |
| PDGFR $\beta$ (28E1)       | Rabbit      | Cell Signaling | 3169             |
| PORIN                      | Rabbit      | Abcam          | AB15895          |
| VE-Cadherin                | Rabbit      | Cell Signaling | D87F2            |
| Cleaved Caspase-3 (Asp175) | Rabbit      | Cell Signaling | 9661             |

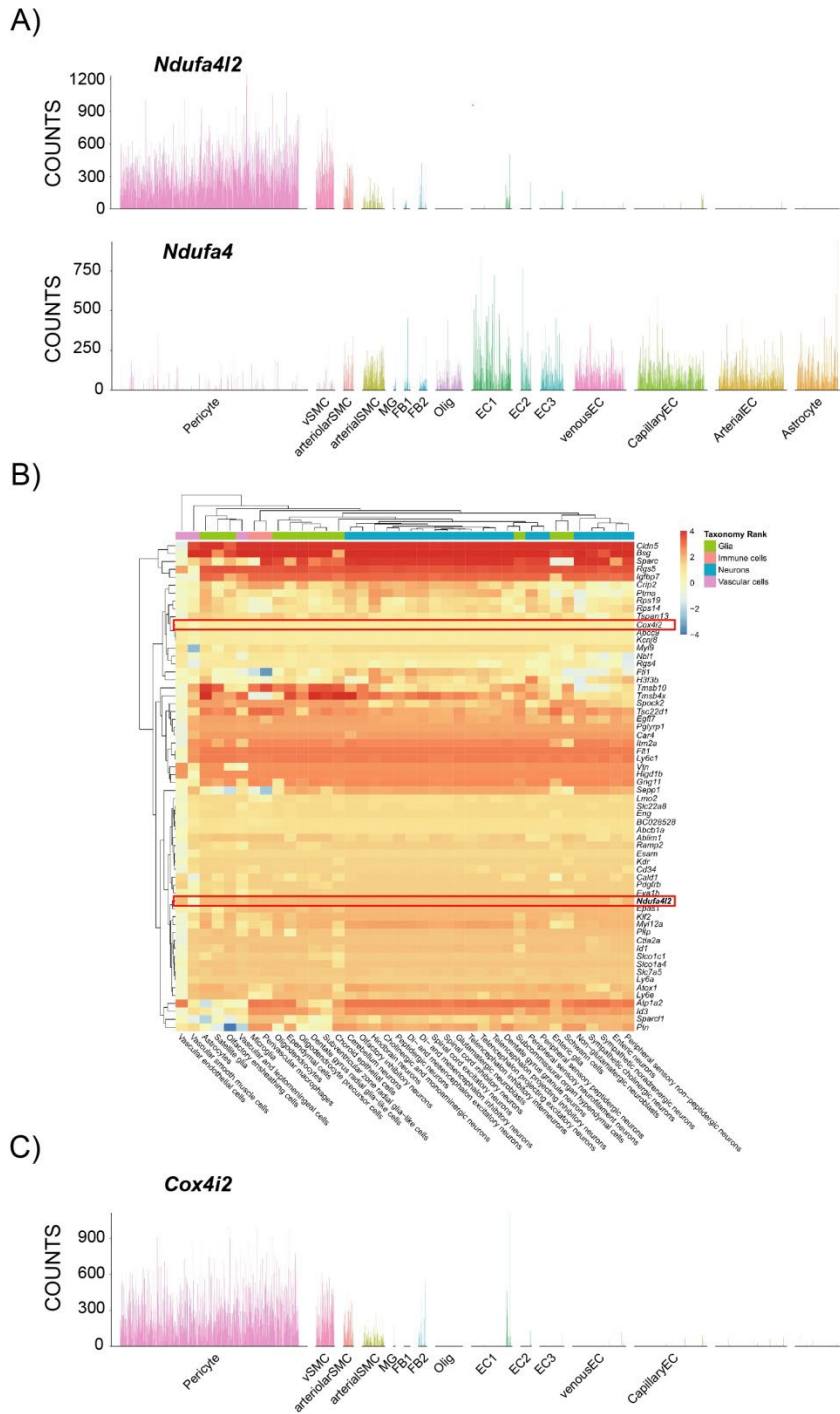

**Figure S1: *Ndufa4l2* and *Cox4i2* expression is confined to pericytes and vascular smooth muscle cells in mouse brain.** (A) Normalized *Ndufa4l2* and *Ndufa4* expression within the clusters identified in the scRNA-seq data set by Vanlandewijck et al.<sup>1</sup> (B) Heatmap showing top enriched genes expressed in brain pericyte cluster relative to other clusters. Data extracted from scRNA-seq data set (Zeisel et al.<sup>2</sup>) (C) Normalized *Cox4i2* expression within the clusters identified in the scRNA-seq data set by Vanlandewijck et al.<sup>1</sup>

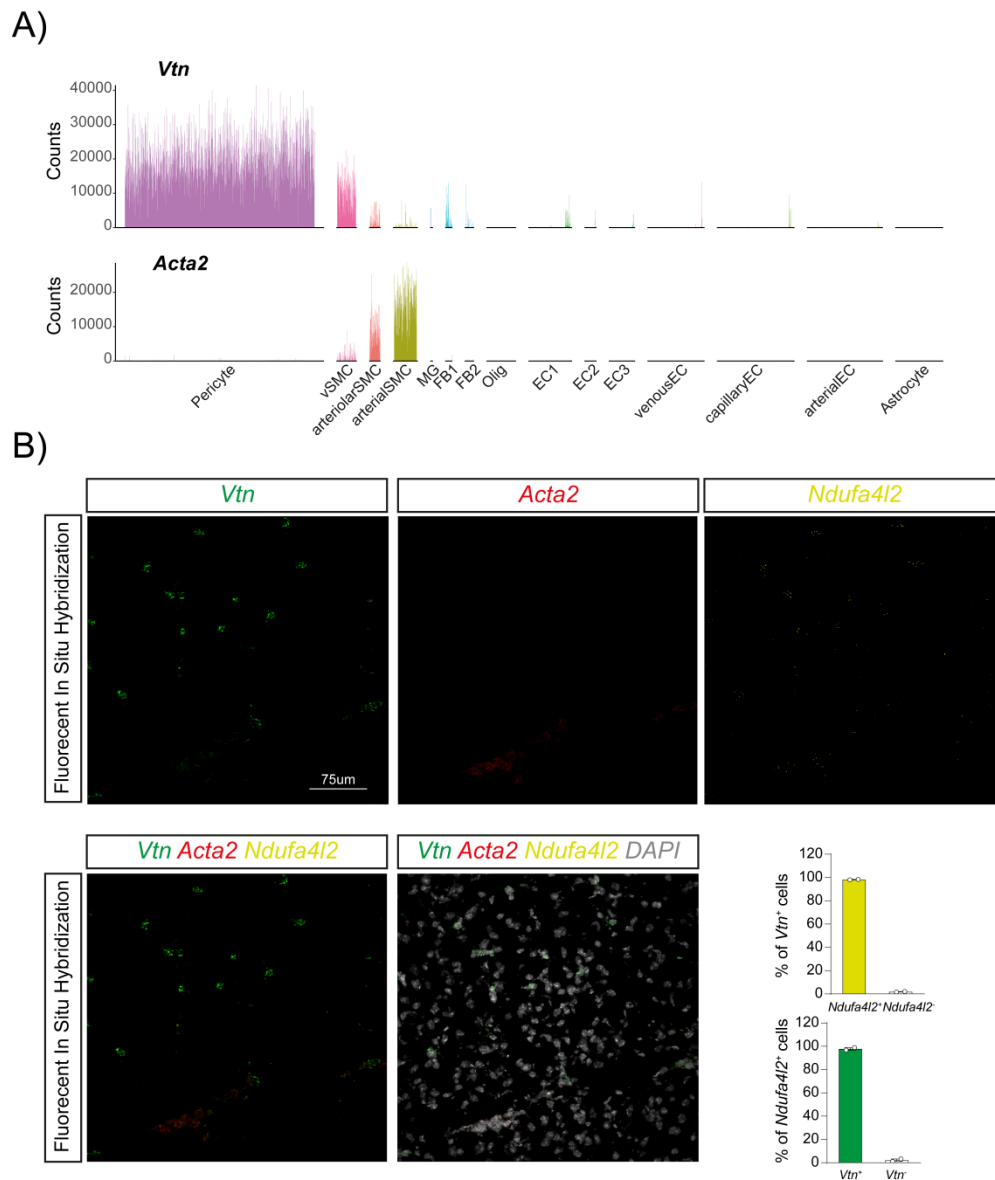

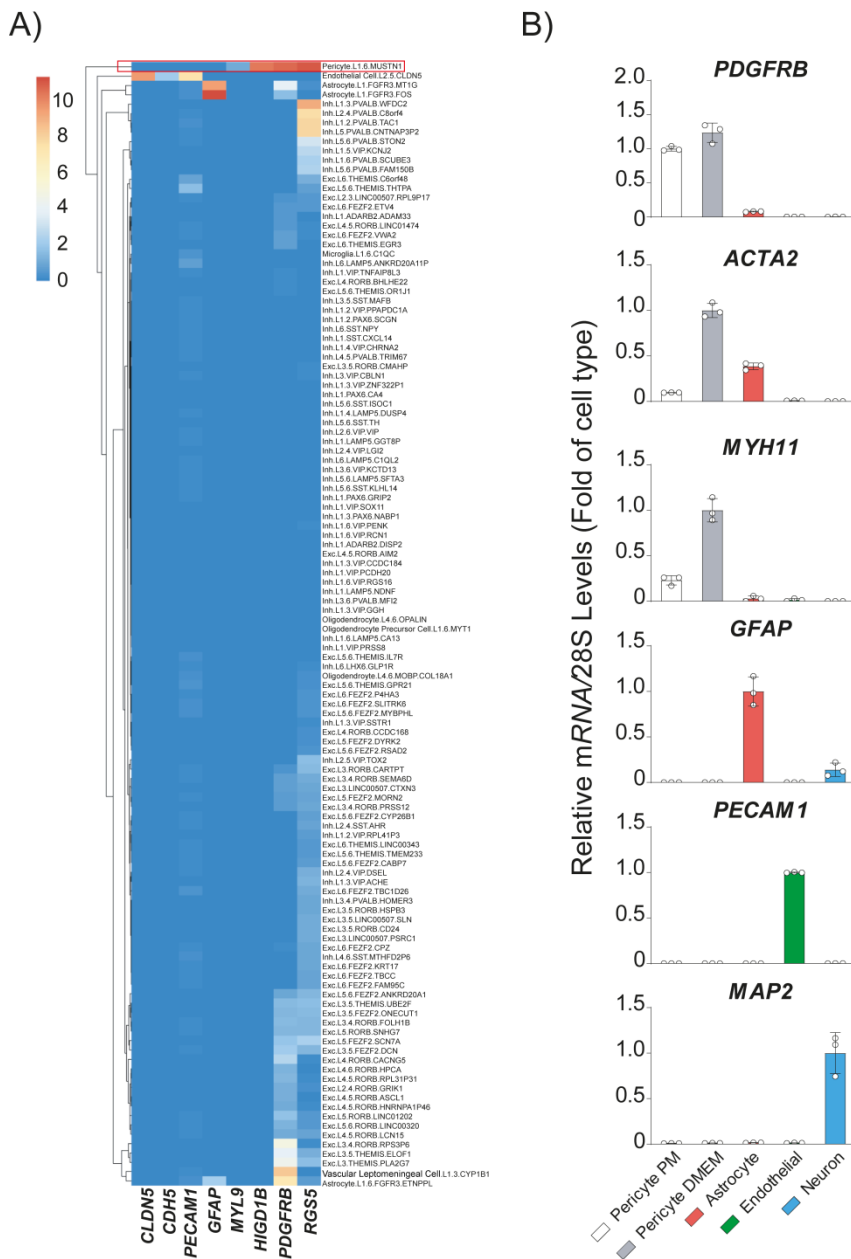

**Figure S3: Molecular characterization of human brain pericytes in vivo and in vitro.** (A) Heatmap showing that the cluster defined as pericytes (first row from the top) expresses positive well-defined molecular markers of human brain pericytes (*RGS5*, *PDGFRB*, *HIGF1B*, *MYL9*) and absence of markers of astrocytes (*GFAP*) or endothelial cells (*PECAM1*, *CDH5*, *CLDN5*). Data extracted from Allen Multiple Cortical Areas - SMART-seq data set. (B) Relative mRNA levels of marker genes of human brain pericytes cultured in pericytes medium (PM) or complete DMEM (*PDGFRB*, *ACTA2*, *MYH11*), astrocytes (*GFAP*), microvascular endothelial cell (*PECAM1*) and neurons (*MAP2*) (n=3). Note the dramatic increase of markers related to muscularization (*ACTA2*, *MYH11*) of pericytes when cultured in complete DMEM.

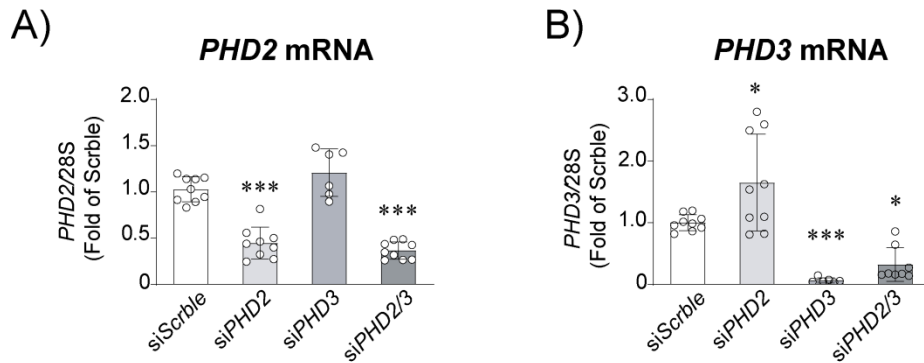

**Figure S4: Effect of transient inactivation of *PHD2*, *PHD3* and double *PHD2/3* in human brain pericytes in vitro.** (A) Relative levels of *PHD2* and (B) *PHD3* transcripts in transient *PHD2*-, *PHD3*- and *PHD2/3*-silenced human brain pericytes and their corresponding siScrble cells (n=7-9). Data are represented as mean  $\pm$  SD; Statistical analysis was performed using one-way ANOVA followed by Tukey's post hoc analysis; \*P < 0.05, \*\*\*P < 0.001, compared with siScrble cells.

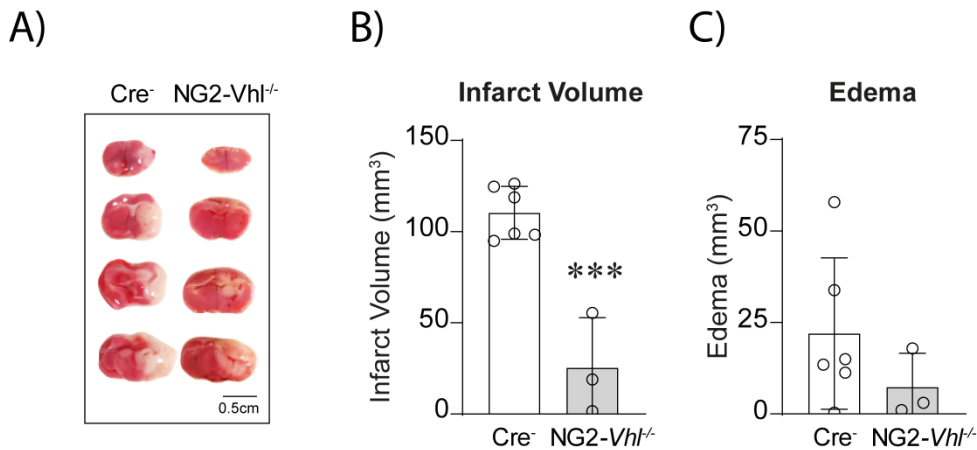

**Figure S5: NG2-Vhl<sup>-/-</sup> mice are protected against cerebral ischemic stroke.** (A) Representative images of infarct volumes obtained by TTC staining and (B and C) quantification of infarct volume by and edema at 24 h after 1 h of ischemia in Cre<sup>-</sup> and NG2-Vhl<sup>-/-</sup> mice (n= 6 and 3 respectively). Data are represented as mean  $\pm$  SD; Statistical analysis was performed using two-tailed Student's t test. \*\*\*P < 0.001, compared with Cre<sup>-</sup> control mice.

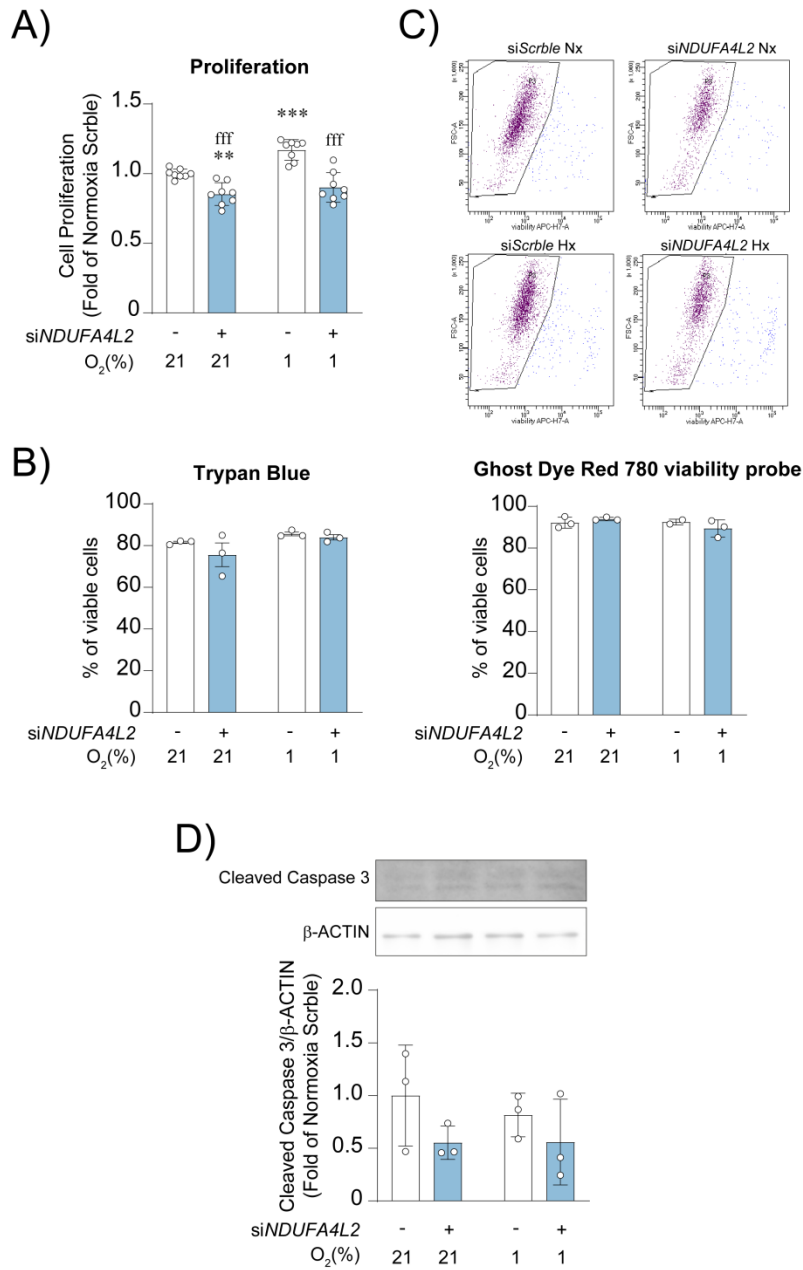

**Figure S6: Effect of transient inactivation of *NDUFA4L2* and hypoxia in human brain pericyte proliferation and survival in vitro.** (A) Human brain pericyte proliferation after transient inactivation of *NDUFA4L2* and/or exposure to hypoxia (1% O<sub>2</sub>) (n=8). (B) Cell viability of human brain pericytes after transient inactivation of *NDUFA4L2* and/or exposure to hypoxia (1% O<sub>2</sub>) assed by Trypan Blue staining (n=3) or (C) Ghost Dye Red 780 staining (n=3). (D) Representative western blot and quantification of cleaved caspase-3 after transient inactivation of *NDUFA4L2* and/or exposure to hypoxia (1% O<sub>2</sub>) (n=3). Data are represented as mean ± SD; Statistical analysis was performed using two-way ANOVA followed by Tukey's post hoc analysis; \*\*P < 0.01, \*\*\*P < 0.001, compared with normoxic si*Scrble* cells; fffP < 0.001 compared with hypoxic si*Scrble*.



### URLs to access scRNA seq data:

1. <http://mousebrain.org/genesearch.html>
2. <http://betsholtzlab.org/VascularSingleCells/database>
3. <https://portal.brain-map.org/atlasses-and-data/rnaseq/human-multiple-cortical-areas-smart-seq>

### References:

1. Vanlandewijck M, He L, Mäe MA, Andrae J, Ando K, Del Gaudio F *et al.* A molecular atlas of cell types and zonation in the brain vasculature. *Nature* 2018; 554(7693): 475-480.
2. Zeisel A, Hochgerner H, Lönnerberg P, Johnsson A, Memić F, van der Zwan J *et al.* Molecular Architecture of the Mouse Nervous System. *Cell* 2018; 174(4): 999-1014.e22.
