# Supplementary material for: Unique expression of the atypical mitochondrial subunit NDUFA4L2 in cerebral pericytes fine tunes HIF activity in response to hypoxia
Source: PubMed Central journal article supplement — J Cereb Blood Flow Metab. 2022 Aug 4;43(1):44–58. doi: 10.1177/0271678X221118236 (PMC9875353; doi:10.1177/0271678x221118236), 2022-08-04

Uncropped blots for figure 3

Uncropped blots for figure 2C

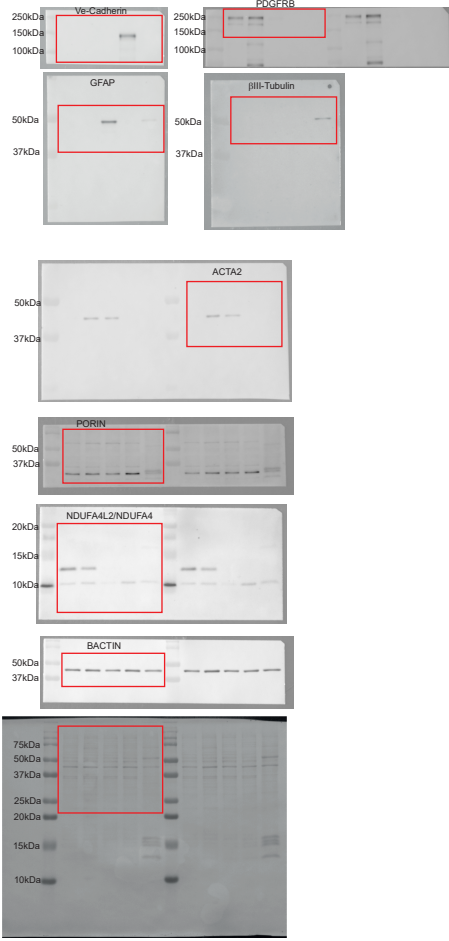

A)

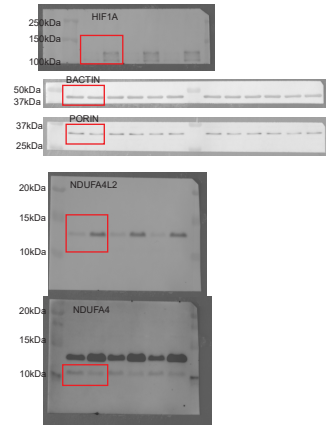

B)

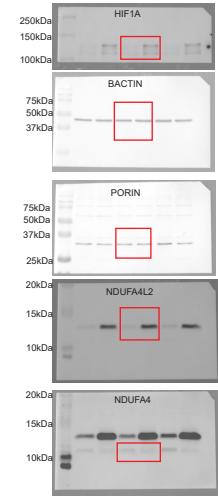

C)

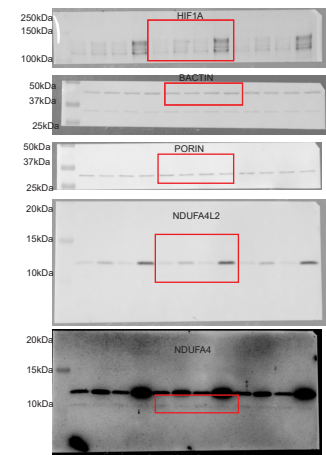

E)

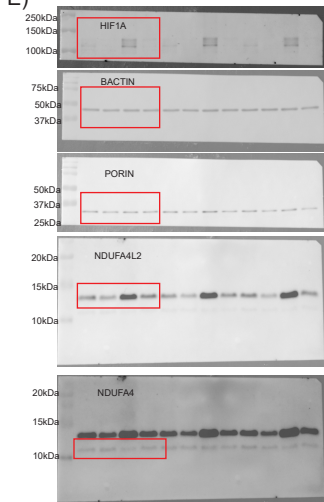

Uncropped blots for figure 4C

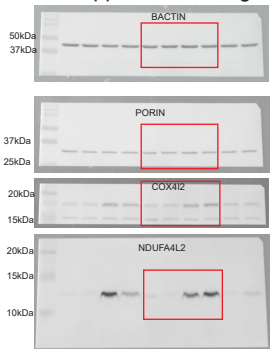

Uncropped blots for figure 5

A)

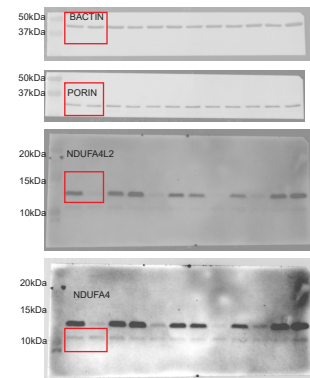

C)

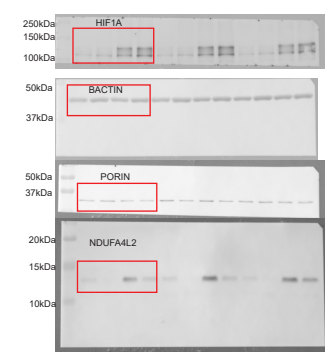

Uncropped blots for figure S5D

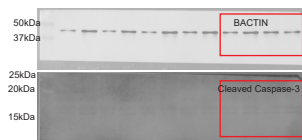

Supplement: sj-pdf-2-jcb-10.1177_0271678X221118236.pdf [file sj-pdf-2-jcb-10.1177_0271678X221118236.pdf]
